# Supplementary material for: Ancient and Novel Small RNA Pathways Compensate for the Loss of piRNAs in Multiple Independent Nematode Lineages
Source: PubMed Central journal article supplement (PMC4323106; doi:10.1371/journal.pbio.1002061), 2015-02-10
Supplement: pbio.1002061.s011.pdf [file pbio.1002061.s011.pdf]

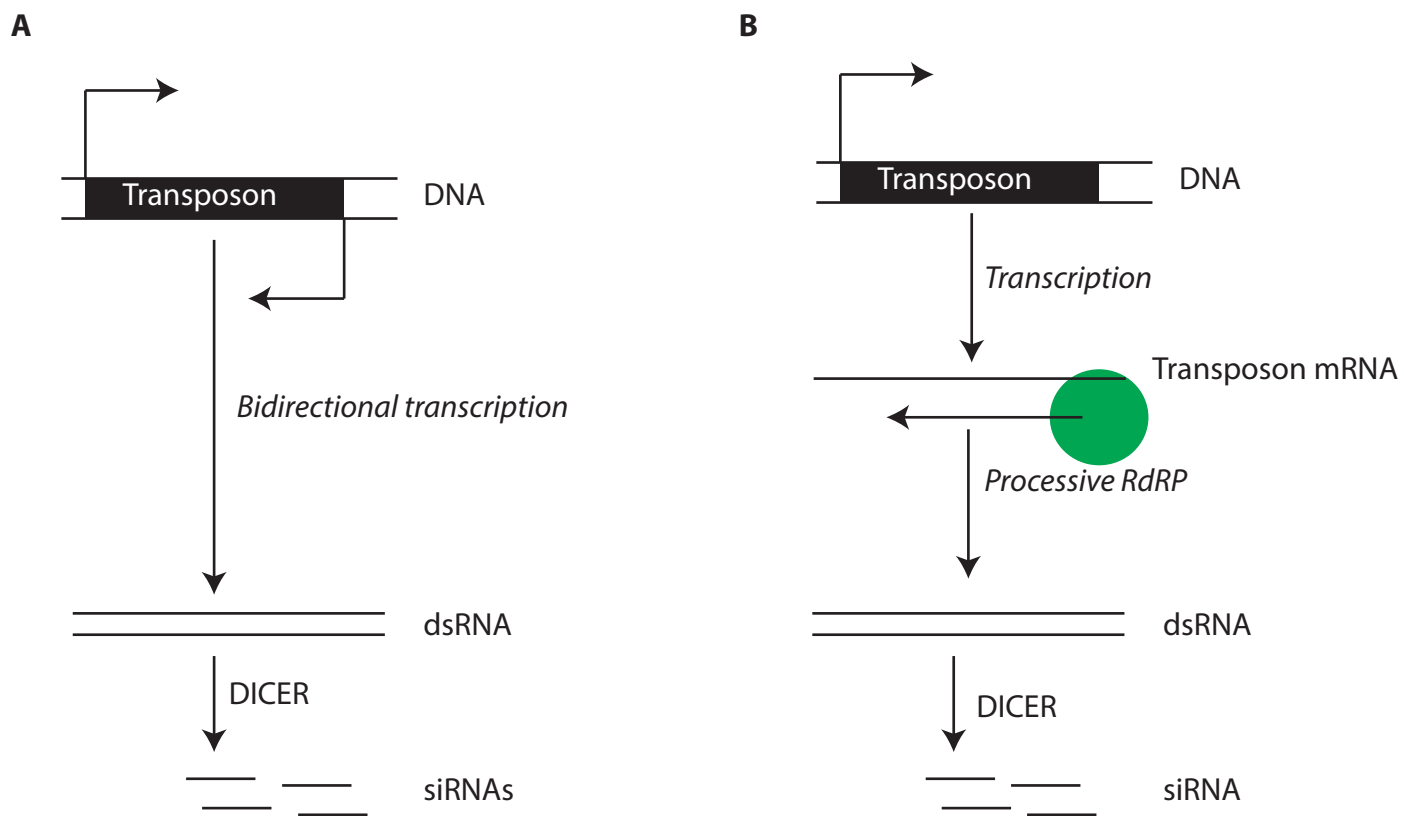

Supplemental Figure 7
